# Supplementary material for: Understanding the sensing mechanisms of perovskite materials for gases with different properties: a perspective from the oxidation–reduction states of central metal ions
Source: Royal Society of Chemistry journal article supplement (doi:10.1039/d1tc03995d), 2021-01-01
Supplement: d1tc03995d1.pdf [file d1tc03995d1.pdf]

## Supporting Information

### **Understanding the sensing mechanisms of perovskite materials for gases with different properties, a perspective from the oxidation-reduction states of the central metal ions**

Bing Zhang,<sup>a,b,c</sup> Yang Yang,<sup>b</sup> Lei Tong,<sup>b</sup> Xiaogang Wang,<sup>b</sup> Bin Hu,<sup>a,b,c</sup> Li Zhao,<sup>a,b</sup> Qiang Lu<sup>\*,a,b,c</sup>

<sup>a</sup> National Engineering Laboratory for Biomass Power Generation Equipment, North China Electric Power University, Beijing 102206, P. R. China;

<sup>b</sup> School of New Energy, North China Electric Power University, Beijing 102206, P. R. China;

<sup>c</sup> State Key Laboratory of Alternate Electrical Power System with Renewable Energy Sources, North China Electric Power University, Beijing 102206, P. R. China.

\* Corresponds author: Email: [qlu@ncepu.edu.cn](mailto:qlu@ncepu.edu.cn) , [qianglu@mail.ustc.edu.cn](mailto:qianglu@mail.ustc.edu.cn) ; Tel.: +86 10 61771335; Fax: +86 10 61772032(801).

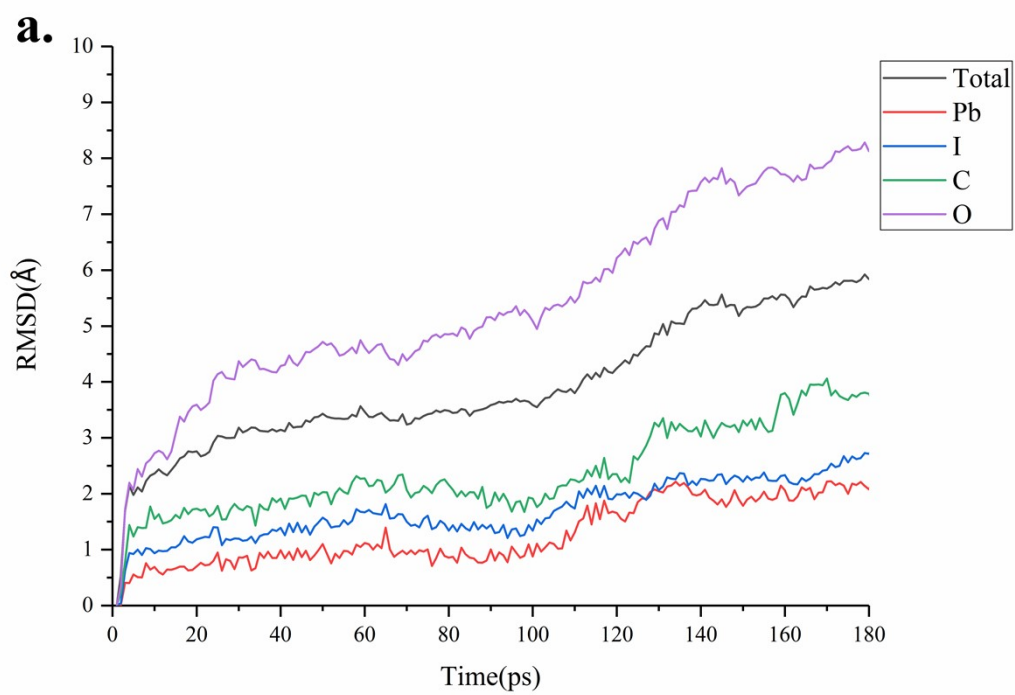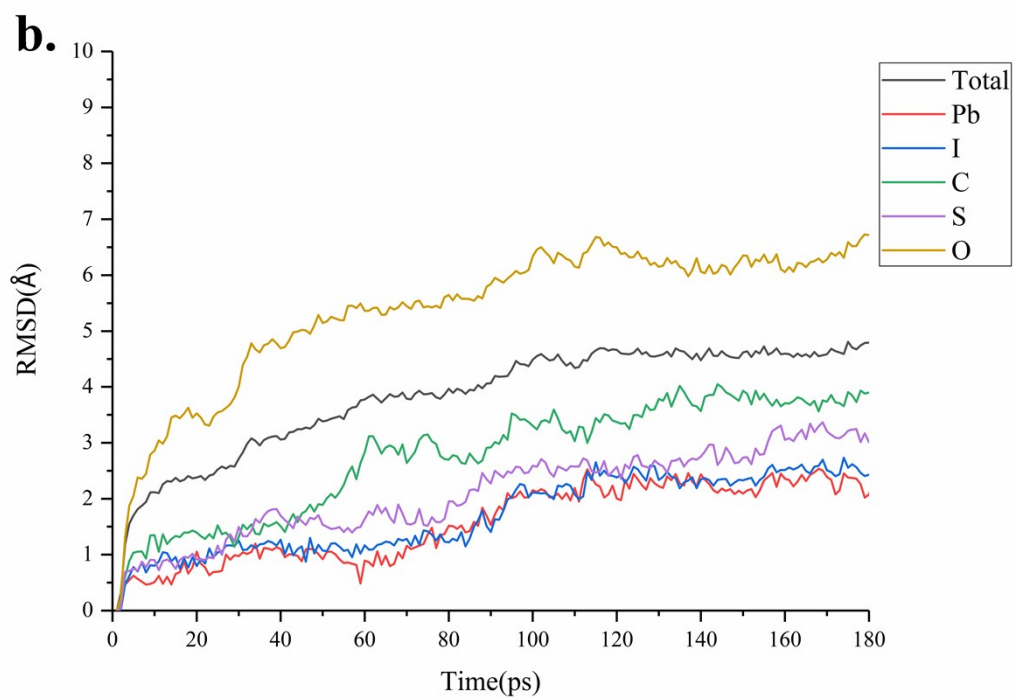

**Fig. S1** The RMSD of (a)  $\text{CH}_3\text{NH}_3\text{PbI}_3$ , and (b)  $(\text{CH}_3\text{NH}_3)_2\text{Pb}(\text{SCN})_2\text{I}_2$ .

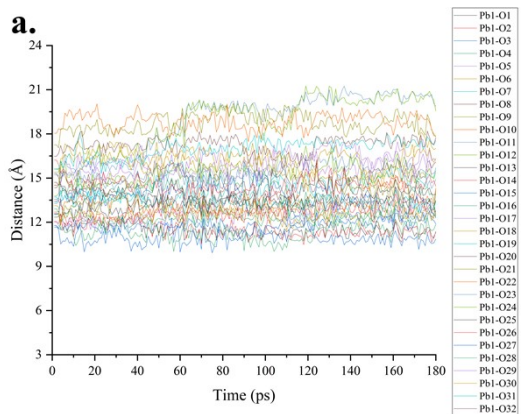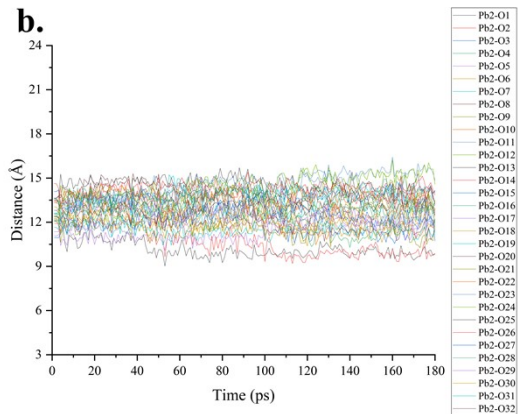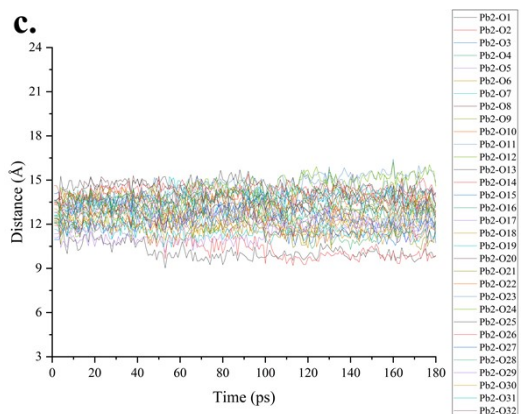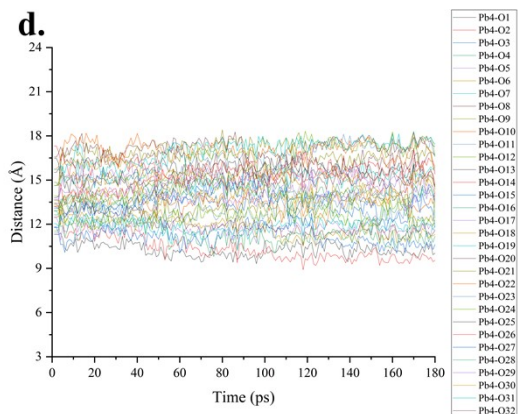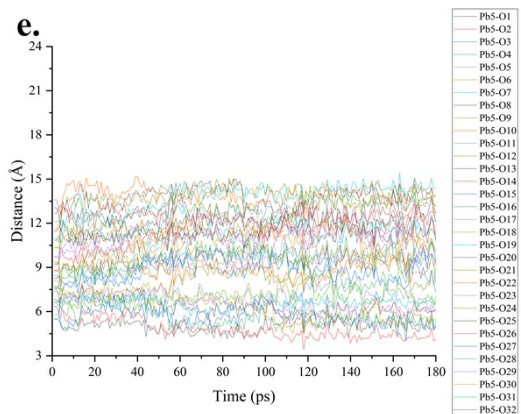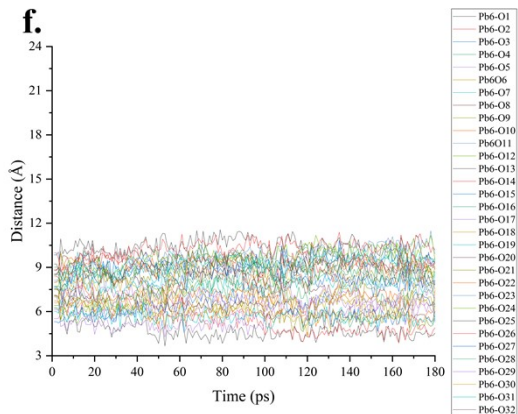

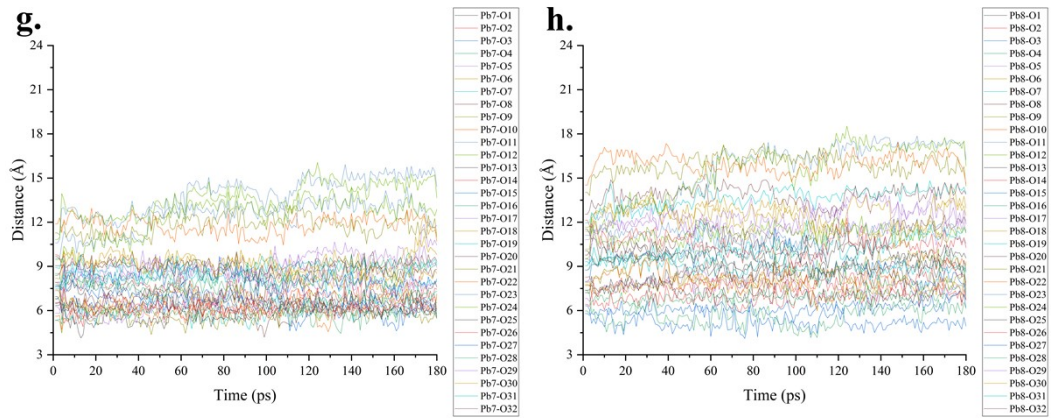

**Fig. S2** The distances of (a) Pb1-O, (b) Pb2-O, (c) Pb3-O, (d) Pb4-O, (e) Pb5-O, (f) Pb6-O, (g) Pb7-O and (h) Pb8-O in CsPbBr<sub>3</sub>•16O<sub>2</sub> system.

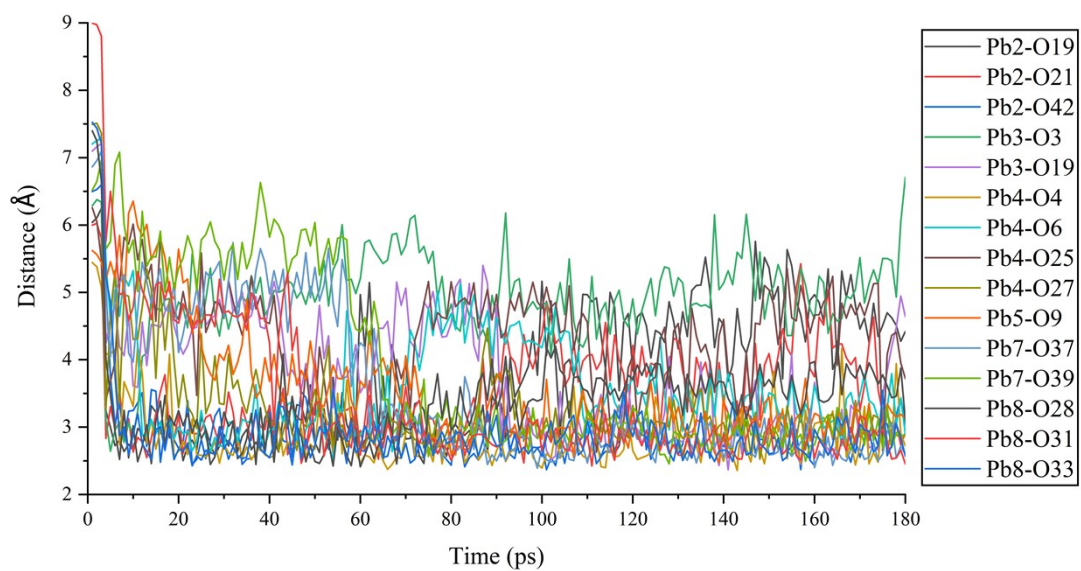

**Fig. S3** The interaction fluctuations between Pb and O3 during the simulations.

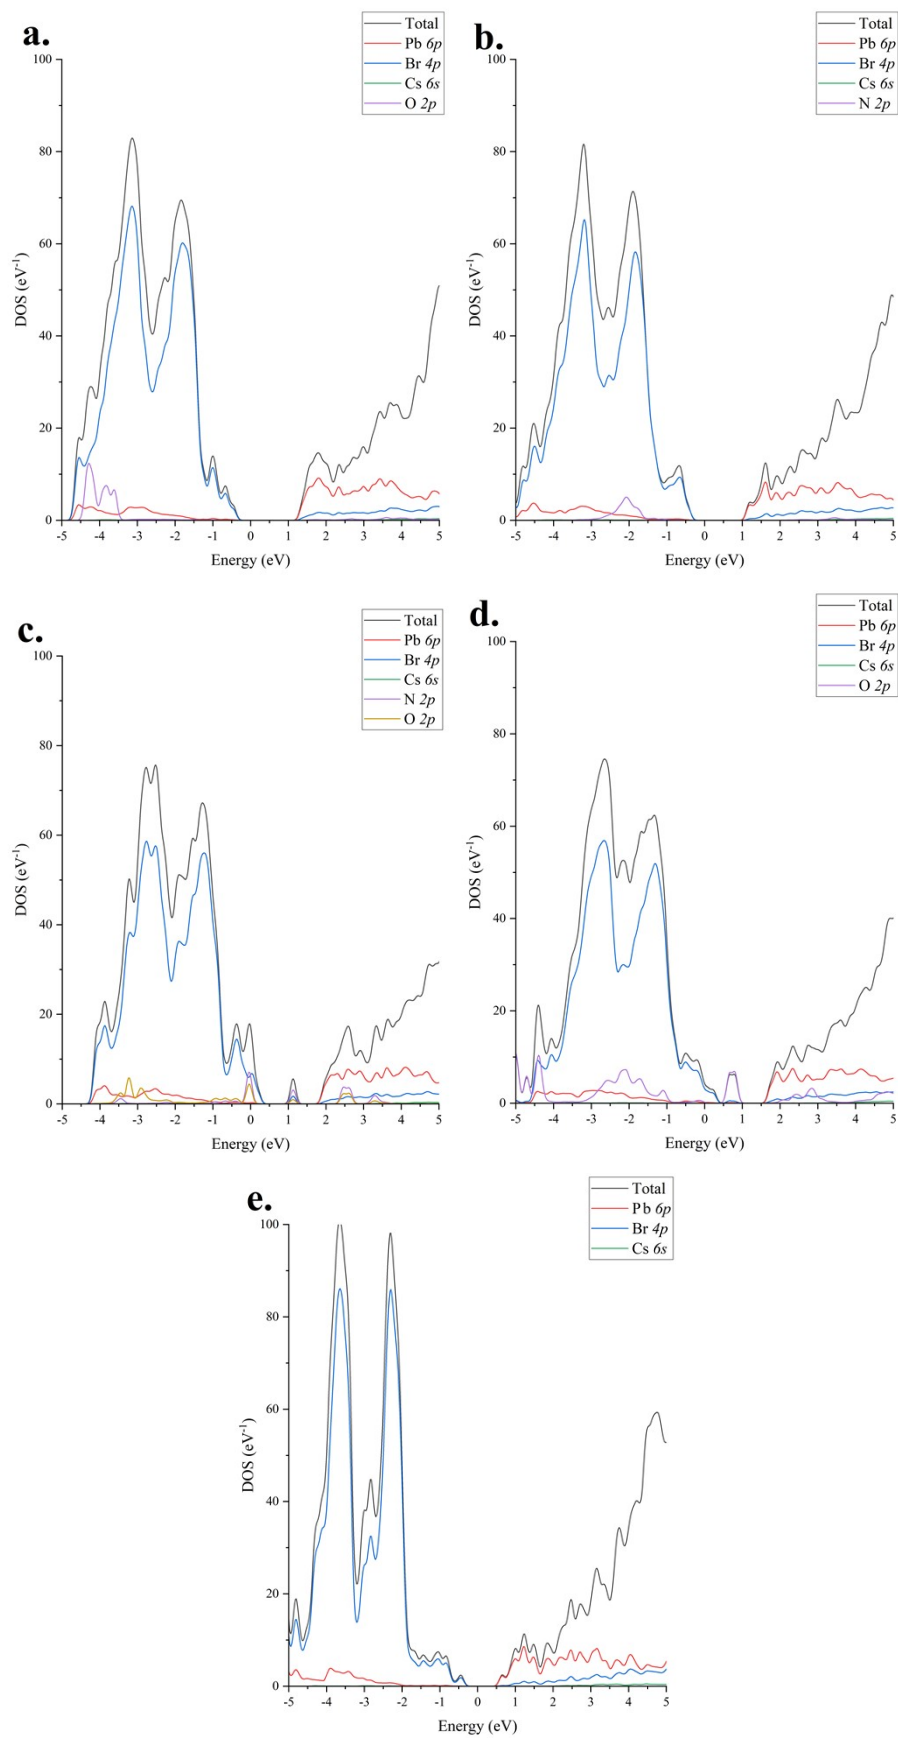

**Fig. S4** The density of states (DOS) of (a)  $\text{CsPbBr}_3\text{-H}_2\text{O}$ , (b)  $\text{CsPbBr}_3\text{-NH}_3$ , (c)  $\text{CsPbBr}_3\text{-NO}_2$ , (d)  $\text{CsPbBr}_3\text{-O}_3$  and (e)  $\text{CsPbBr}_3$ , respectively.
